# Supplementary material for: Electrocorticographic evidence of a common neurocognitive sequence for mentalizing about the self and others
Source: PubMed Central journal article supplement (PMC8993891; doi:10.1038/s41467-022-29510-2), 2022-04-08
Supplement: 41467_2022_29510_MOESM1_ESM.pdf [file 41467_2022_29510_MOESM1_ESM.pdf]

# Electrocorticographic evidence of a common neurocognitive sequence for mentalizing about the self and others

## Supplementary Information

Kevin M. Tan<sup>1</sup>, Amy L. Daitch<sup>2</sup>, Pedro Pinheiro-Chagas<sup>2</sup>, Kieran C.R. Fox<sup>2,3</sup>, Josef Parvizi<sup>2,3</sup>, Matthew D. Lieberman<sup>1</sup>

<sup>1</sup> Social Cognitive Neuroscience Laboratory, Department of Psychology, University of California, Los Angeles, CA, USA

<sup>2</sup> Laboratory of Behavioral and Cognitive Neuroscience, Department of Neurology and Neurological Sciences, Stanford University, CA, USA

<sup>3</sup> School of Medicine, Stanford University, CA, USA

Correspondence: Matthew D. Lieberman ([lieber@ucla.edu](mailto:lieber@ucla.edu)) & Kevin M. Tan ([kevmtan@ucla.edu](mailto:kevmtan@ucla.edu))

## Contents

|                                                                                         |     |
|-----------------------------------------------------------------------------------------|-----|
| Supplementary Methods: Controlling for stimulus visual dissimilarity                    | 2-4 |
| Supplementary Figure 1: Visual dissimilarity of task stimuli                            | 2   |
| Supplementary Figure 2: Within-participant analytic pipeline                            | 5   |
| Supplementary Figure 3: Trialwise propagation of activation onsets across ROIs          | 6   |
| Supplementary Figure 4: Behavioral results                                              | 7   |
| Supplementary Figure 5: ROI activation latencies using behavior-matched trials          | 8   |
| Supplementary Figure 6: Expanded lateralized views of Fig. 3a                           | 9   |
| Supplementary Figure 7: Expanded lateralized views of Fig. 3c                           | 10  |
| Supplementary Figure 8: Expanded lateralized views of Fig. 4a                           | 11  |
| Supplementary Figure 9: Expanded lateralized views of Fig. 5a                           | 12  |
| Supplementary Table 1: Aggregate ROI encoding of visual and mentalizing-related effects | 4   |
| Supplementary Table 2: Participant demographics and characteristics                     | 13  |
| Supplementary Table 3: Summary statistics of single-trial HFB metrics                   | 14  |
| Supplementary Table 4: Stimulus prompts                                                 | 15  |
| Supplementary References                                                                | 16  |

## Supplementary Methods: Controlling for stimulus visual dissimilarity

### Computer vision methods

To account for visual dissimilarity between task stimuli (alphanumeric prompts; see Fig. 1a & Supplementary Table 4), we used a popular computer vision model for object recognition: the Jarrett Hierarchical Model (JHM; [Jarrett et al., 2009](#)<sup>1</sup>). We chose JHM due to its high proficiency in alphanumeric character recognition (99.47% accuracy on 50,000 alphanumeric images), along with its biologically-inspired design (based on the ventral visual stream hierarchy).

First, we rendered all stimulus prompts in the manner they were

presented to participants (white text on black screen, 1200x800 pixels; Fig. 1a). Prompt renders were then analyzed by JHM, producing output feature maps of size 61x41 per prompt. To quantify visual dissimilarity across stimuli, feature maps of each prompt were compared through representational similarity analysis<sup>2</sup>. The resulting dissimilarity matrix was collapsed into two visual dimensions (VD1 and VD2) using nonmetric multidimensional scaling with Kruskal's normalized stress1 criterion<sup>3</sup>. Note that VDs were purely data-driven; all JHM features were used with no manual pre-selection or weighting.

To confirm whether VD1 and VD2 reasonably represented task prompts, we plotted each stimulus in the Cartesian space formed by the two VDs (Supplementary Fig. 1a), revealing the expected visual dissimilarity across experimental conditions. To confirm that VDs represented prompt length, the primary visual feature of interest, we correlated VDs with the number of characters in each stimulus (Supplementary Fig. 1b). VD1 had a very robust correlation with prompt length ( $r_{293}=.991$ ,  $p<2.23e-308$ ), while the correlation with VD2 was nonsignificant ( $r_{293}=-.019$ ,  $p=0.747$ ). As such, we surmise that VD1 represents prompt length, while VD2 represents remaining visual features.

### Statistical methods

We aimed to reveal which regions-of-interest (ROIs) encoded the VDs while controlling for mentalizing-related effects (mentalizing type,  $RT_{\text{Behav}}$ , and  $\text{Choice}_{\text{Behav}}$ ; Supplementary Table 1). To this end, we analyzed single-trial metrics of high-frequency broadband activity (HFB; see Fig. 1de) from mentalizing-active sites (see

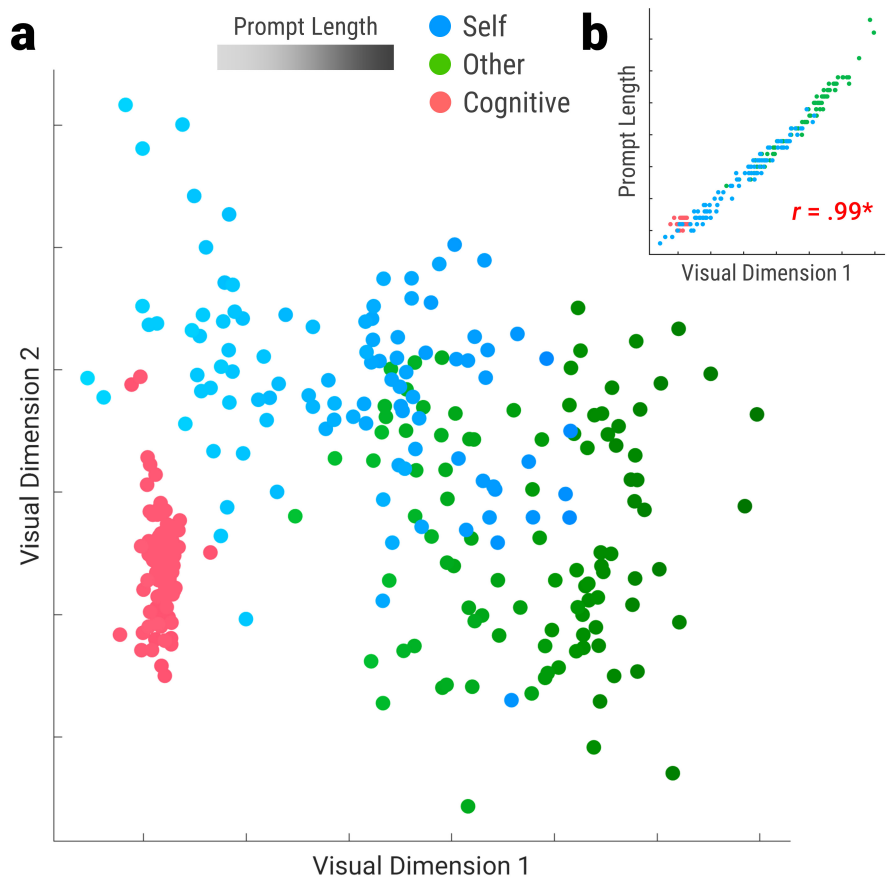

**Supplementary Figure 1:** Visual dissimilarity of task stimuli using the Jarrett Hierarchical Model (JHM). **a)** Multidimensional scaling of JHM stimulus representations into two visual dimensions (VDs). **b)** Correlation between VD1 and prompt length (number of characters):  $r_{293}=.991$ ,  $p<2.23e-308$ . Source data are provided as a Source Data file.

Fig. 3ab) using linear mixed-effects models (LMEMs). VDs were represented as fixed and random effects, while mentalizing-related effects were represented as random effects. LMEMs were nested within Site and Participant. To minimize estimation bias, LMEMs used restricted maximum likelihood estimators. To account for full data dependence structure with reduced bias and assumptions, LMEMs used unconstrained variance-covariance matrices with log-Cholesky parametrization. To account for heterogeneous variances across LMEM terms, Satterthwaite approximation for degrees of freedom (effective *DF*) was used. To rectify violations of assumptions and overparameterization in LMEMs, we evaluated objective function Hessian matrices and ensured positive definiteness (see *Statistics* in Main Methods).

To control for stimulus visual dissimilarity in the main aggregate ROI analyses (Figs. 4de, 5c-e & Table 1), VD1 and VD2 were used as 'nuisance' random effects in LMEMs as specified in the main manuscript (see *Statistics* and *Aggregate ROI analyses* in Main Methods for further details).

### *Neuronal encoding of mentalistic and visual features*

When examining ROIs for visual encoding while controlling for mentalizing-related effects, we found that visual cortex had more numerous significant VD associations than other ROIs (Supplementary Table 1). Within the default mode network (DMN), some significant VD associations were found in temporoparietal DMN ROIs (tpDMN): temporoparietal junction (TPJ), anterior temporal lobe (ATL), and posteromedial cortex (PMC). As expected, visual encoding did not extend to the medial prefrontal cortices (mPFC) of DMN, as all VD effects were nonsignificant in mPFC ROIs: anteromedial prefrontal cortex (amPFC), dorsomedial prefrontal cortex (dmPFC), and ventromedial prefrontal cortex (vmPFC).

After controlling for VDs in the main aggregate ROI analyses, mentalizing-related effects (mentalizing type,  $RT_{\text{Behav}}$ , and  $\text{Choice}_{\text{Behav}}$ ) were still significant in all DMN ROIs (Figs. 4de, 5c-e & Supplementary Table 1). However, in visual cortex, the only notable mentalizing-related effect – marked self/other differences in peak power – became nonsignificant (Fig. 5e).

Taken together, DMN encoding of mentalistic features appears distinct from visual features such as prompt length. In contrast, visual cortex encoding appears primarily driven by visual features rather than mentalizing *per se*. Intriguingly, tpDMN ROIs significantly encoded both mentalistic and visual features – even when controlling for each other – using common HFB metrics (Supplementary Table 1), indicating that tpDMN regions encode mentalistic and visual features in a simultaneous yet dissociable manner. Indeed, numerous neuroimaging studies report simultaneous visual and semantic encoding in tpDMN regions<sup>4-6</sup>. Meanwhile, we found that mPFC ROIs produced numerous significant mentalizing-related effects yet no significant VD effects (Supplementary Table 1), adding further evidence that mPFC regions are situated at the highest levels of the cortical hierarchy, furthest removed from concrete sensorimotor processing. As such, mPFC appears most specialized for highly abstract mentalistic processing – though we do not claim that mPFC is *only* specialized for mentalizing (see Main Discussion).

**Supplementary Table 1:** Aggregate ROI encoding of visual and mentalistic features. Regions-of-interest (ROI) are defined in Fig. 1c. Significant  $p$ -values are bolded ( $p < .05$ , uncorrected, two-tailed). Linear mixed-effect modeling (LMEM) was used to analyze single-trial activation metrics (see Fig. 1e) from mentalizing-active ROI sites (see Fig. 3a) during mentalizing. To account for site- and participant-related heterogeneity, LMEMs were nested within Site and Participant. Separate LMEMs were used per ROI and HFB metric. **VD1** and **VD2** indicate visual dimensions extracted from computer vision representations of task stimuli (see Supplementary Fig. 1). Each VD effect was controlled for all other effects shown here. **Type<sub>Other-Self</sub>** indicates mentalizing type differences, controlled for  $RT_{\text{Behav}}$  and VDs (Fig. 5c-e). **RT<sub>Behav</sub>** indicates behavioral response time effects, controlled for behavioral response choices and VDs (Fig. 4de). **Choice<sub>True-False</sub>** indicates behavioral response choice differences, controlled for  $RT_{\text{Behav}}$  and VDs (see Fig. 1a for task). Note: non-VD results are copied from Table 1.

**Abbreviations:** ROI = region-of-interest, HFB = high-frequency broadband (70-180 Hz), ms = millisecond,  $z$  =  $z$ -score,  $b$  = slope estimate,  $SE$  = standard error of  $b$ , Visual = visual cortex, ATL = anterior temporal lobe, TPJ = temporoparietal junction, PMC = posteromedial cortex, amPFC = anteromedial prefrontal cortex, dmPFC = dorsomedial prefrontal cortex, vmPFC = ventromedial prefrontal cortex. Source data are provided as a Source Data file.

| VD1                          | Onset (ms) |       |                 | Peak (ms) |       |                 | Offset (ms) |       |                 | Duration (ms) |       |                 | Peak Power (z) |       |                 |
|------------------------------|------------|-------|-----------------|-----------|-------|-----------------|-------------|-------|-----------------|---------------|-------|-----------------|----------------|-------|-----------------|
|                              | $b$        | $SE$  | $p$             | $b$       | $SE$  | $p$             | $b$         | $SE$  | $p$             | $b$           | $SE$  | $p$             | $b$            | $SE$  | $p$             |
| Visual                       | -.220      | .090  | <b>.015</b>     | .436      | .027  | <b>&lt;.001</b> | 10.646      | .281  | <b>&lt;.001</b> | 1.389         | .442  | <b>.002</b>     | 1.827          | .595  | <b>.002</b>     |
| TPJ                          | .339       | .427  | .428            | .834      | .845  | .323            | 2.469       | .522  | <b>&lt;.001</b> | 1.817         | .598  | <b>.002</b>     | 2.096          | .627  | <b>.001</b>     |
| ATL                          | .008       | .453  | .986            | .065      | .561  | .908            | .888        | .649  | .171            | 1.252         | .539  | <b>.020</b>     | 1.052          | .496  | <b>.034</b>     |
| PMC                          | -.186      | .277  | .502            | .294      | .518  | .571            | 1.184       | .412  | <b>.004</b>     | 1.195         | .636  | .060            | 2.824          | .617  | <b>&lt;.001</b> |
| amPFC                        | .014       | .661  | .983            | 1.431     | 1.344 | .287            | .803        | .564  | .155            | 3.396         | 5.351 | .526            | .582           | .901  | .518            |
| dmPFC                        | .247       | .379  | .515            | 1.178     | .760  | .121            | .807        | .509  | .113            | 3.778         | 3.255 | .246            | 1.693          | .967  | .080            |
| vmPFC                        | .402       | .693  | .562            | .387      | 1.199 | .747            | .193        | .781  | .805            | 1.034         | 1.288 | .422            | 1.682          | 1.190 | .158            |
| VD2                          | $b$        | $SE$  | $p$             | $b$       | $SE$  | $p$             | $b$         | $SE$  | $p$             | $b$           | $SE$  | $p$             | $b$            | $SE$  | $p$             |
| Visual                       | .470       | .564  | .405            | -2.549    | 1.056 | <b>.016</b>     | -25.244     | 1.242 | <b>&lt;.001</b> | -5.589        | 1.857 | <b>.003</b>     | -3.262         | 2.708 | .228            |
| TPJ                          | .618       | 1.622 | .703            | 2.386     | 3.608 | .509            | 6.472       | 2.352 | <b>.006</b>     | -1.280        | 2.412 | .596            | 2.142          | 2.844 | .451            |
| ATL                          | -1.971     | 1.838 | .284            | -2.051    | 3.255 | .529            | -44.613     | 2.347 | <b>&lt;.001</b> | -5.561        | 2.601 | <b>.033</b>     | -4.907         | 2.499 | <b>.050</b>     |
| PMC                          | .534       | 2.127 | .802            | -4.644    | 3.391 | .171            | -2.883      | 2.495 | .248            | -.014         | 2.846 | .996            | -5.362         | 2.921 | .066            |
| amPFC                        | -2.978     | 2.346 | .205            | -10.103   | 8.146 | .215            | -4.522      | 2.600 | .082            | -.222         | 3.668 | .952            | -2.873         | 4.494 | .523            |
| dmPFC                        | .424       | 1.989 | .831            | -5.227    | 3.397 | .124            | -3.005      | 1.997 | .133            | 4.116         | 2.432 | .091            | 2.388          | 2.971 | .422            |
| vmPFC                        | 1.902      | 3.209 | .553            | -.519     | 5.712 | .928            | -3.712      | 4.161 | .373            | -5.678        | 5.423 | .295            | -13.799        | 9.106 | .130            |
| Type <sub>Other-Self</sub>   | $b$        | $SE$  | $p$             | $b$       | $SE$  | $p$             | $b$         | $SE$  | $p$             | $b$           | $SE$  | $p$             | $b$            | $SE$  | $p$             |
| Visual                       | -4         | 3     | .230            | 2         | 7     | .731            | 10          | 14    | .456            | 7             | 19    | .718            | .025           | .013  | .058            |
| TPJ                          | 1          | 14    | .962            | 11        | 46    | .808            | 2           | 28    | .951            | 4             | 28    | .886            | .002           | .017  | .901            |
| ATL                          | 16         | 18    | .376            | 80        | 30    | <b>.007</b>     | 58          | 26    | <b>.026</b>     | 71            | 28    | <b>.013</b>     | .021           | .012  | .091            |
| PMC                          | -12        | 7     | .088            | 71        | 15    | <b>&lt;.001</b> | 112         | 18    | <b>&lt;.001</b> | 101           | 40    | <b>.011</b>     | .251           | .045  | <b>&lt;.001</b> |
| amPFC                        | 34         | 28    | .230            | 182       | 30    | <b>&lt;.001</b> | 151         | 13    | <b>&lt;.001</b> | 158           | 21    | <b>&lt;.001</b> | .013           | .074  | .857            |
| dmPFC                        | 20         | 18    | .279            | 189       | 45    | <b>&lt;.001</b> | 130         | 9     | <b>&lt;.001</b> | 130           | 20    | <b>&lt;.001</b> | .023           | .041  | .569            |
| vmPFC                        | 21         | 37    | .571            | 203       | 63    | <b>.001</b>     | 160         | 18    | <b>&lt;.001</b> | 193           | 52    | <b>&lt;.001</b> | .147           | .154  | .341            |
| RT <sub>Behav</sub>          | $b$        | $SE$  | $p$             | $b$       | $SE$  | $p$             | $b$         | $SE$  | $p$             | $b$           | $SE$  | $p$             | $b$            | $SE$  | $p$             |
| Visual                       | .004       | .002  | <b>.021</b>     | .006      | .004  | .143            | .897        | .006  | <b>&lt;.001</b> | .239          | .015  | <b>&lt;.001</b> | .014           | .008  | .106            |
| TPJ                          | .025       | .005  | <b>&lt;.001</b> | .292      | .023  | <b>&lt;.001</b> | .904        | .014  | <b>&lt;.001</b> | .143          | .016  | <b>&lt;.001</b> | .085           | .018  | <b>&lt;.001</b> |
| ATL                          | .009       | .008  | .272            | .270      | .023  | <b>&lt;.001</b> | .772        | .015  | <b>&lt;.001</b> | .096          | .011  | <b>&lt;.001</b> | .020           | .012  | .086            |
| PMC                          | .017       | .007  | <b>.012</b>     | .336      | .493  | <b>&lt;.001</b> | .853        | .023  | <b>&lt;.001</b> | .209          | .012  | <b>&lt;.001</b> | .033           | .018  | .060            |
| amPFC                        | .041       | .015  | <b>.006</b>     | .428      | .024  | <b>&lt;.001</b> | .970        | .008  | <b>&lt;.001</b> | .158          | .018  | <b>&lt;.001</b> | .037           | .021  | .076            |
| dmPFC                        | .038       | .008  | <b>&lt;.001</b> | .426      | .021  | <b>&lt;.001</b> | .987        | .007  | <b>&lt;.001</b> | .183          | .015  | <b>&lt;.001</b> | .086           | .013  | <b>&lt;.001</b> |
| vmPFC                        | .010       | .019  | .604            | .407      | .105  | <b>&lt;.001</b> | .987        | .015  | <b>&lt;.001</b> | .197          | .041  | <b>&lt;.001</b> | .058           | .090  | .521            |
| Choice <sub>True-False</sub> | $b$        | $SE$  | $p$             | $b$       | $SE$  | $p$             | $b$         | $SE$  | $p$             | $b$           | $SE$  | $p$             | $b$            | $SE$  | $p$             |
| Visual                       | 0          | 3     | .991            | -21       | 12    | .079            | -11         | 8     | .141            | -21           | 14    | .138            | -.025          | .013  | .058            |
| TPJ                          | -2         | 14    | .911            | -14       | 28    | .616            | -20         | 21    | .347            | -16           | 25    | .509            | .021           | .031  | .504            |
| ATL                          | -9         | 20    | .651            | -21       | 34    | .548            | -12         | 21    | .563            | -21           | 20    | .278            | -.017          | .022  | .447            |
| PMC                          | -10        | 10    | .355            | -5        | 16    | .765            | -3          | 15    | .848            | -3            | 20    | .869            | -.010          | .023  | .650            |
| amPFC                        | 19         | 25    | .463            | -43       | 34    | .206            | -13         | 17    | .451            | -36           | 29    | .221            | -.021          | .028  | .444            |
| dmPFC                        | 16         | 15    | .312            | -27       | 28    | .334            | -21         | 9     | <b>.020</b>     | -27           | 13    | <b>.040</b>     | -.076          | .030  | <b>.011</b>     |
| vmPFC                        | 26         | 44    | .562            | -50       | 53    | .350            | -10         | 25    | .686            | -50           | 48    | .300            | -.006          | .041  | .875            |

**N per ROI (trials x sites):** Visual = 8453; TPJ = 3189; ATL = 3046; PMC = 4301; amPFC = 2012; dmPFC = 3438; vmPFC = 1060

**Supplementary Figure 2.** Within-participant analytic pipeline using Participant 5. Exemplar ROI sites are indicated by arrows in Panel C. **a)** Heatmaps of high-frequency broadband power (HFB; 70-180 Hz) within each timepoint and trial (z-scored). Black areas indicate timepoints discarded due to presentation of the next trial's stimulus. **b)** Trial-averaged timecourses of evoked HFB responses ( $\beta$ ) estimated by linear mixed-effects models using the data in panel (a). Thick solid lines indicate significant responses relative to the pre-stimulus baseline ( $p_{FDR} < .05$ , corrected across trials and sites), while thin dotted lines indicate nonsignificant (NS) responses. **c)** Whole-cortex results overlaid on the participant's native cortical surface. Activation refers to HFB power significantly higher than baseline, while deactivation refers to HFB power significantly lower than baseline ( $p_{FDR} < .05$ , corrected across trials and sites). Mentalizing-active sites are colored by self/other selectivity, which was determined by robust regression of single-trial HFB peak power across mentalizing type ( $p_{FDR} < .05$ , corrected across sites). *Abbreviations:* ROI = region-of-interest, Visual = visual cortex, ATL = anterior temporal lobe, TPJ = temporoparietal junction, PMC = posteromedial cortex, amPFC = anteromedial prefrontal cortex, dmPFC = dorsomedial prefrontal cortex, vmPFC = ventromedial prefrontal cortex.

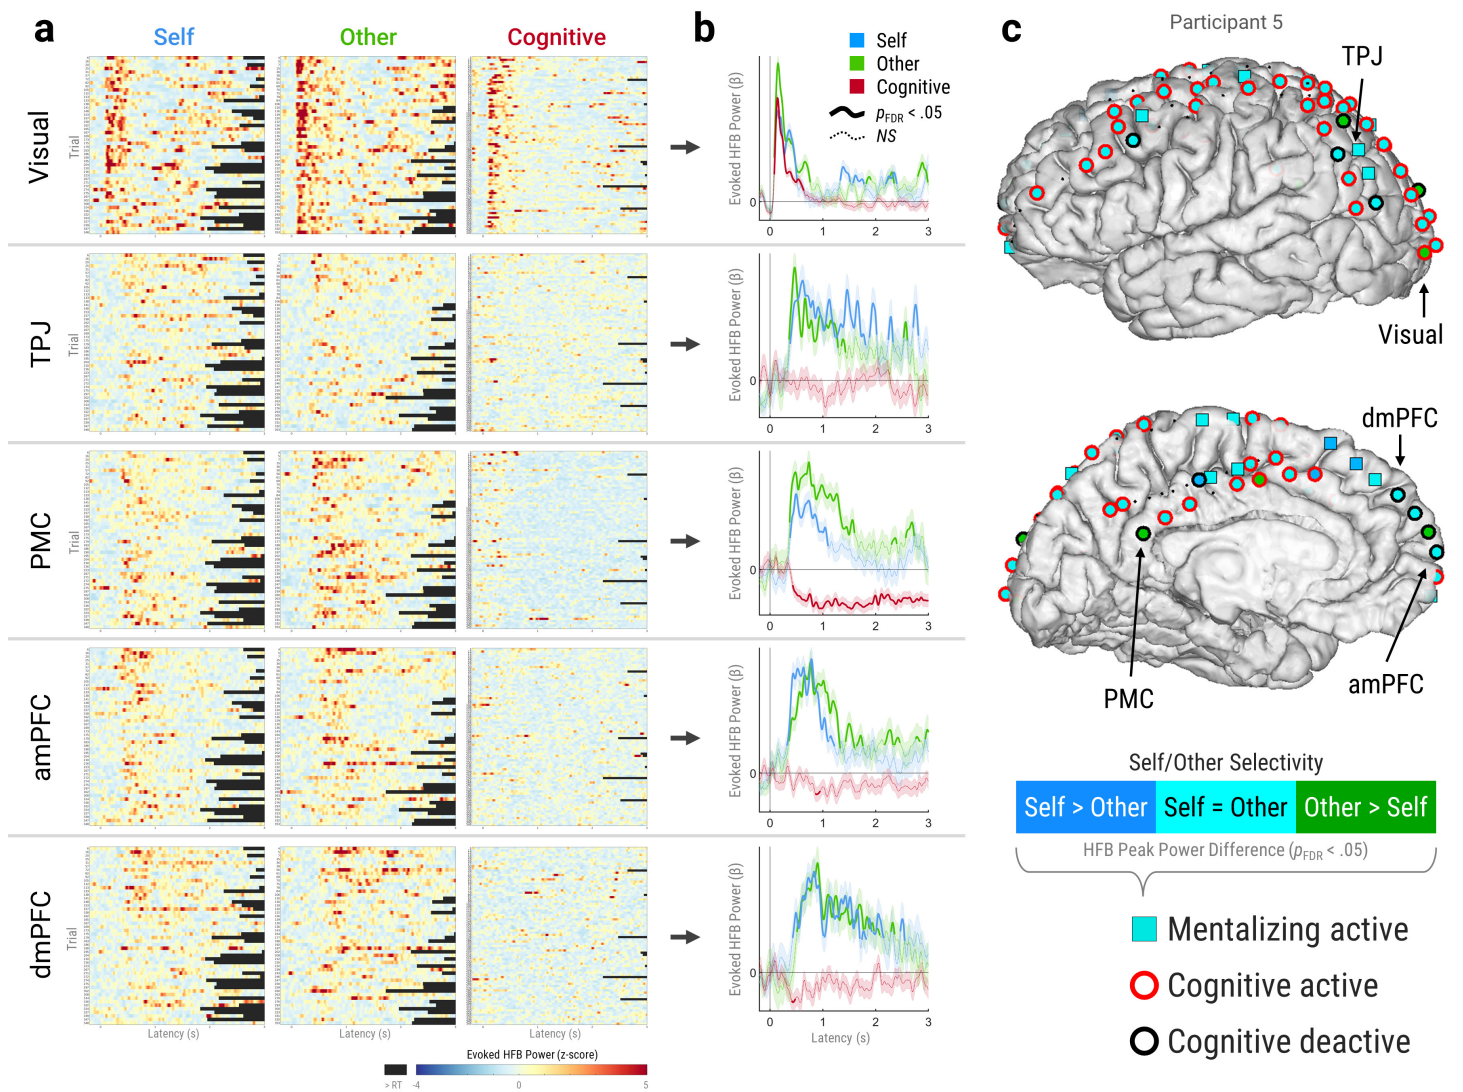

**Supplementary Figure 3:** Trialwise propagation of activation onsets across ROI groups (combined ROIs) during mentalizing. Dots indicate single-trial means from mentalizing-active ROI sites. Thin lines connect individual trials. Black lines connect grand means. Error bars indicate standard error of grand means. Colors indicate participant; color lightness slightly varied across trials to increase legibility. **a)** Participants with simultaneous coverage in two or more ROI groups.  $N=3558$  (trials x ROI groups). **b)** Participants with simultaneous coverage in all ROI groups.  $N=2296$  (trials x ROI groups). *Abbreviations:* ROI = region-of-interest, Visual = visual cortex, ATL = anterior temporal lobe, TPJ = temporoparietal junction, PMC = posteromedial cortex, amPFC = anteromedial prefrontal cortex, dmPFC = dorsomedial prefrontal cortex, vmPFC = ventromedial prefrontal cortex. Source data are provided as a Source Data file.

*ROI groups:* Visual = visual cortex; tpDMN = temporoparietal DMN (TPJ, ATL & PMC); mPFC = medial prefrontal cortex (amPFC, dmPFC & vmPFC).

*Methods:* To determine if onset latencies increased sequentially across ROI groups within trials (Visual < tpDMN < mPFC), we used random effects models with ROIgroup nested within Trial within Participant. This specification provides within-trial ROIgroup estimates while accounting for any missing ROI groups in certain participants in panel **a**. After model estimation, a trend contrast was performed on within-trial ROIgroup estimates [contrast coefficients = Visual(-3), tpDMN(1), mPFC(2)]. Heterogenous variance between trials, participants, and ROI groups was accounted for by unconstrained variance-covariance parameters between random effect nesting levels, along with Satterthwaite approximation for degrees of freedom. This analysis was performed separately using participants in panels **a** and **b**.

*Results:* **a)** For participants with coverage in 2+ ROI groups, we found a robust within-trial trend of onset latency differences across ROIs ( $F_{1,1538}=3408, p<2.23e-308$ ). **b)** For participants with coverage in all ROI groups, the trend contrast was also robust ( $F_{1,862}=2642, p=1.04e-264$ ).

*Conclusions:* These results show consistent trial-by-trial propagation of mentalizing activations, which began in visual cortex, then spread to tpDMN regions, and finally to mPFC regions. Taken together, these results portray a pathway of mentalizing processing across ROIs.

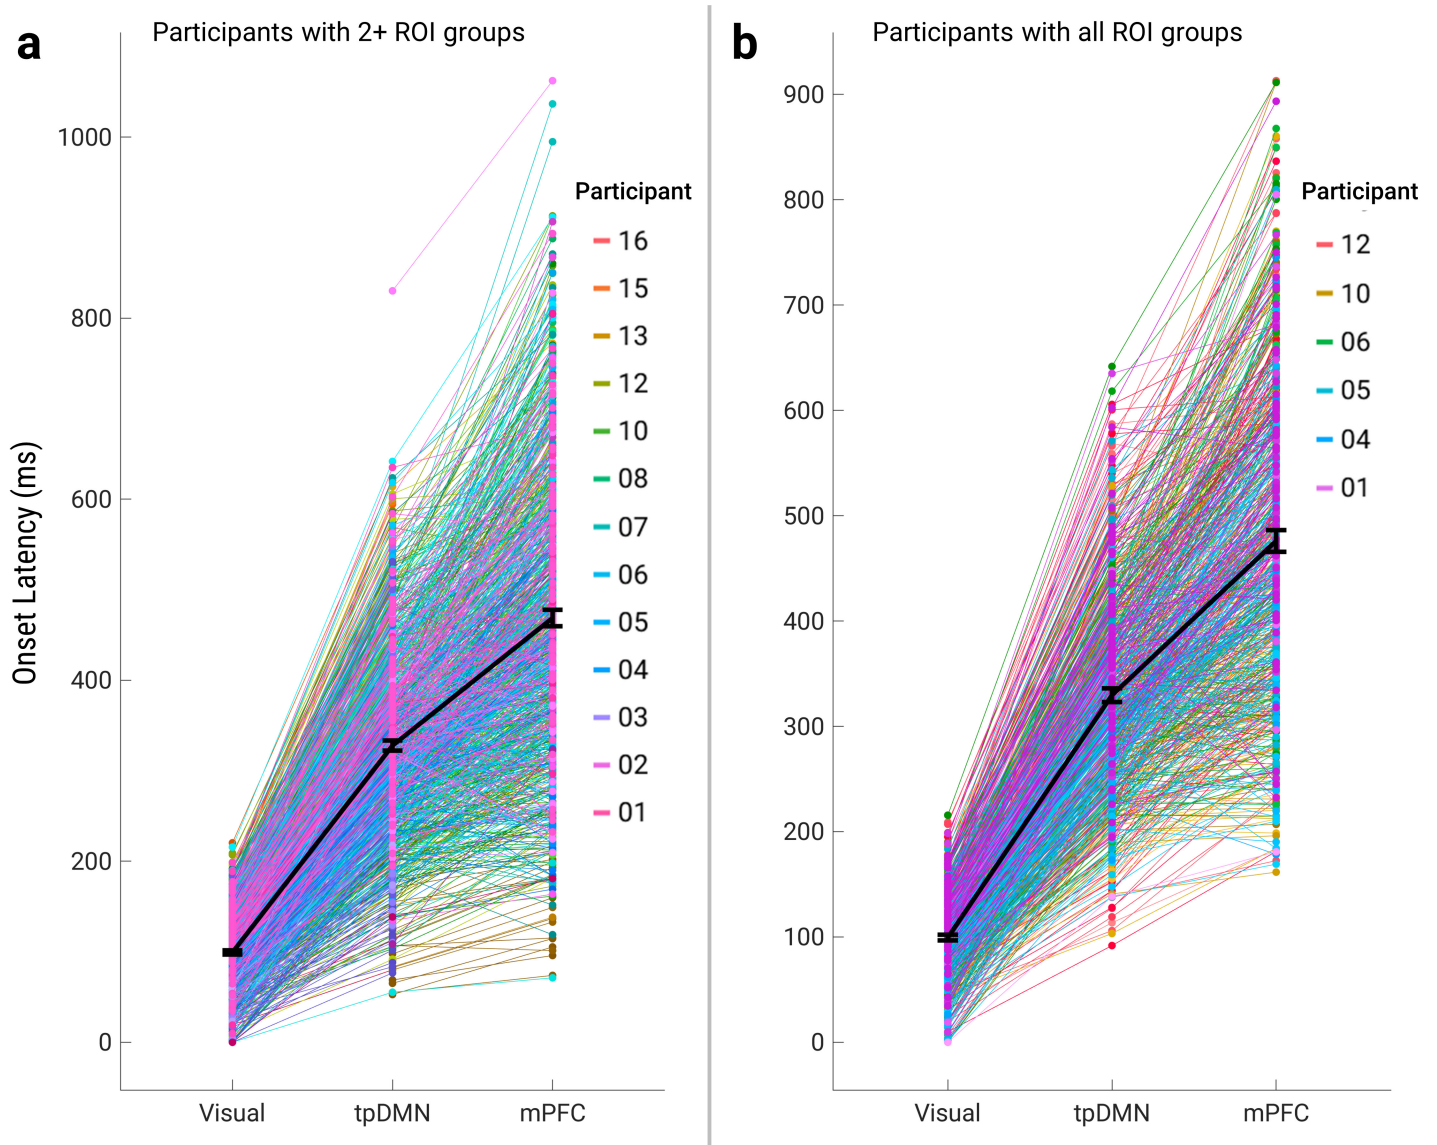

**Supplementary Figure 4:** Behavioral results. See corresponding section of Main Results for statistical results. Boxplots represent Q1 (25%), median (50%), and Q3 (75%) as the lower, center, and upper bounds of the box, respectively. Boxplot whisker minima indicate  $Q1 - 1.5 \times \text{interquartile range}$ . Boxplot whisker maxima indicate  $Q3 + 1.5 \times \text{interquartile range}$ . **a)** Distribution of behavioral response times ( $RT_{\text{Behav}}$ ). The thick black line shows the upper 5000 ms cutoff for aggregate ROI analyses of mentalizing (see Table 1).  $N=3150$  trials. **b)** Accuracy of cognitive task trials (arithmetic). Accuracy was not available for mentalizing trials due to the subjectiveness of trait judgments and participant-specific mentalizing targets (themselves and a previous or current neighbor).  $N=1400$  trials. **c)** Behavioral response choices ( $\text{Choice}_{\text{Behav}}$ ) across the affective valence of self- and other-mentalizing prompts. The bolded black stars indicate the grand mean across all participants.  $N=1475$  trials. Source data are provided as a Source Data file.

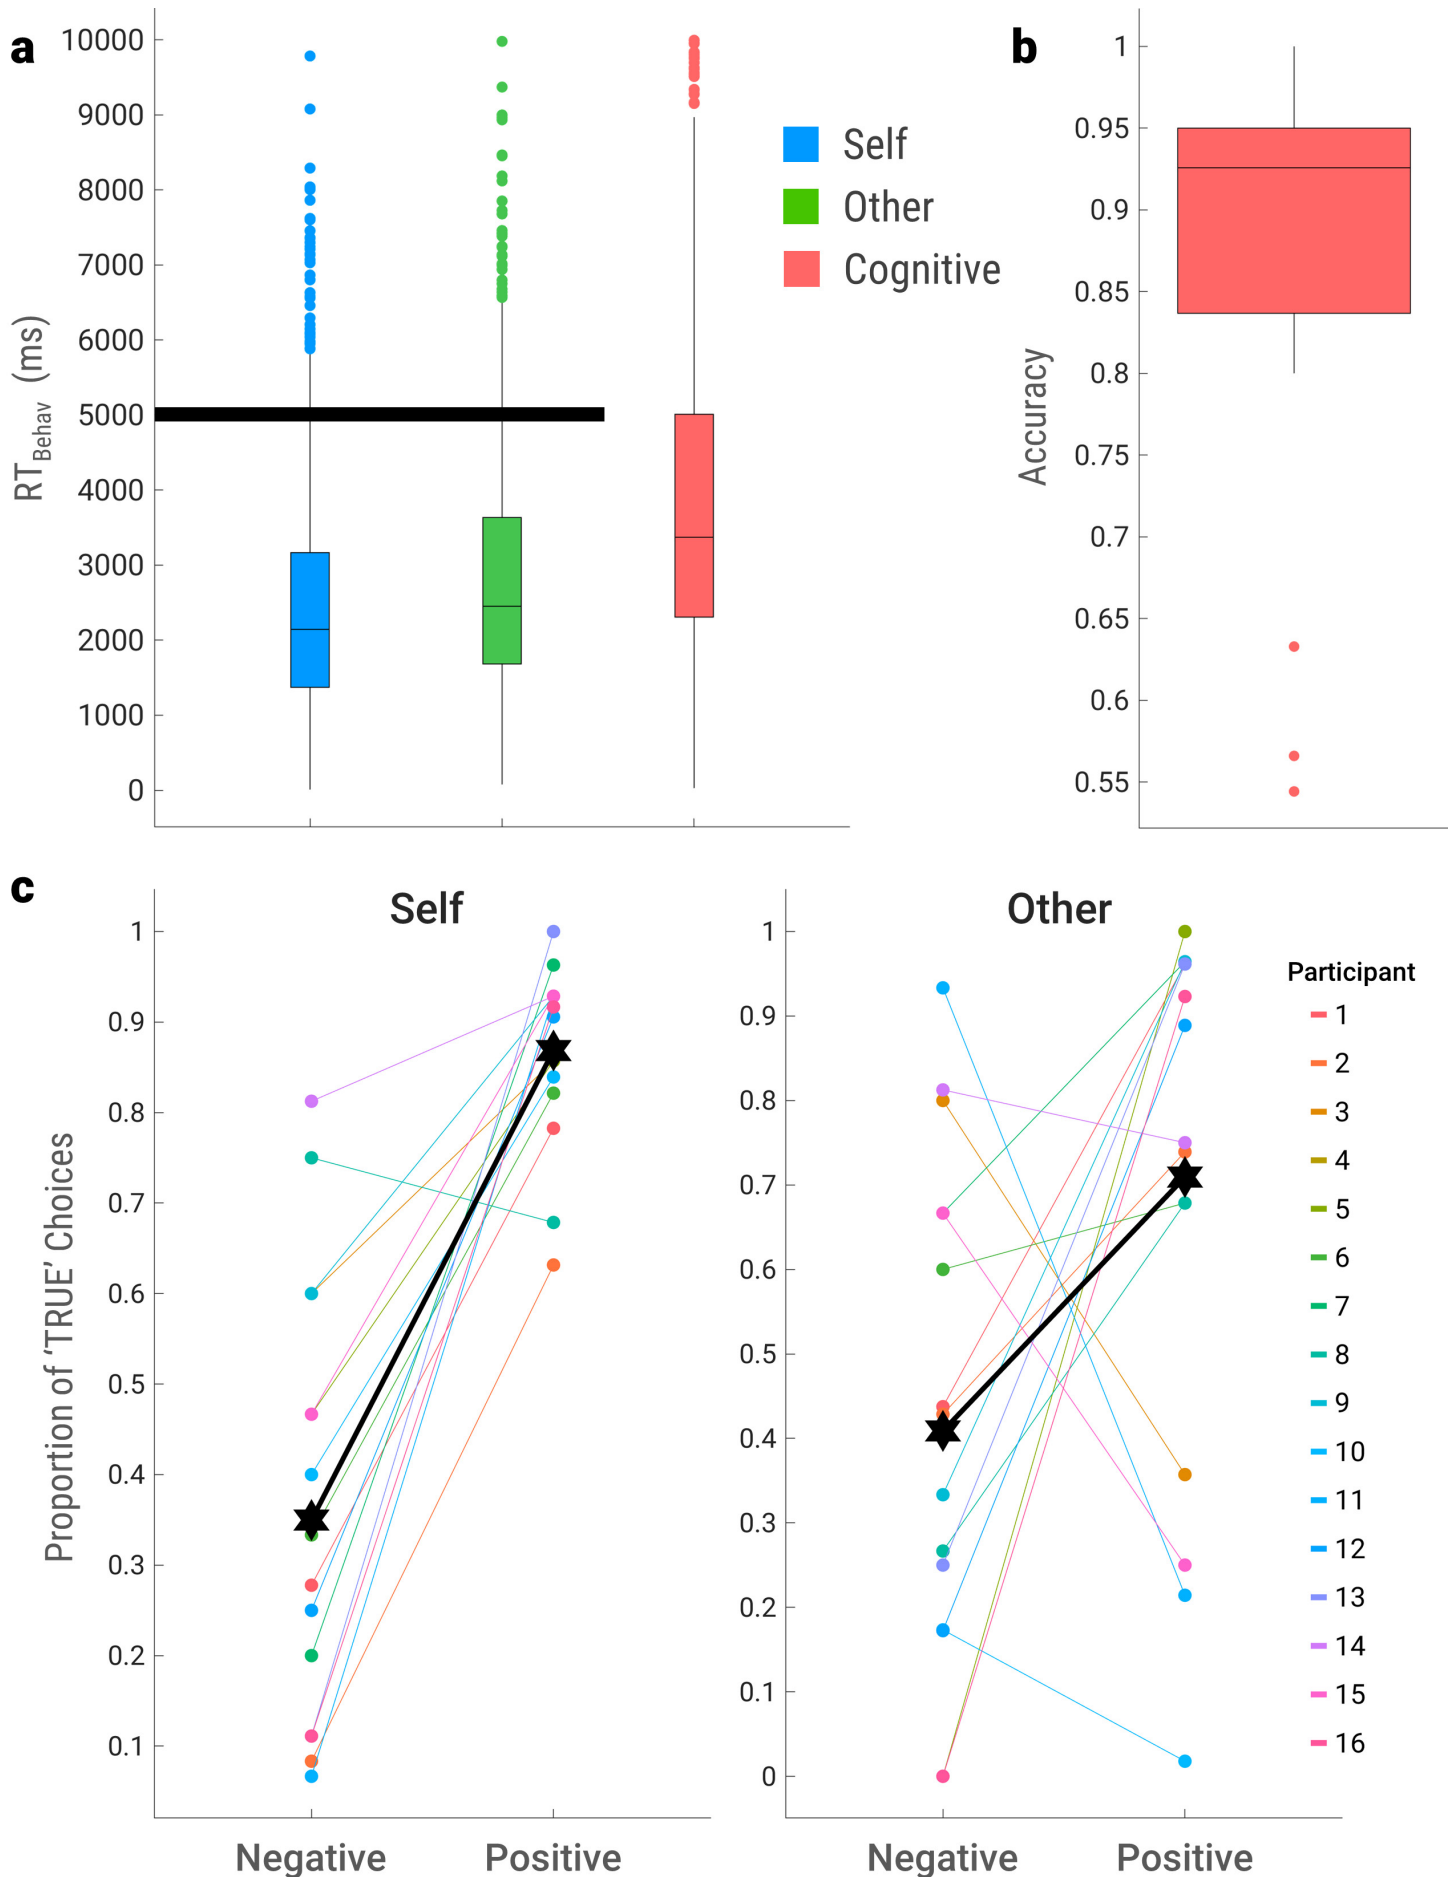

**Supplementary Figure 5:** Mean activation latencies within mentalizing type and ROIs using behavior-matched trials. Mean behavioral response time was  $2000 \pm 5$  ms for each ROI and mentalizing type (self-mentalizing = blue, other-mentalizing = green). Left and right floating bar edges represent onsets and offsets, respectively, while diamonds represent peaks (see Fig. 1e). Error bars indicate standard error of the mean.  $N=2124$  (trials  $\times$  sites). *Abbreviations:* ROI = region-of-interest, Vis = visual cortex, ATL = anterior temporal lobe, TPJ = temporoparietal junction, PMC = posteromedial cortex, amPFC = anteromedial prefrontal cortex, dmPFC = dorsomedial prefrontal cortex, vmPFC = ventromedial prefrontal cortex. Source data are provided as a Source Data file.

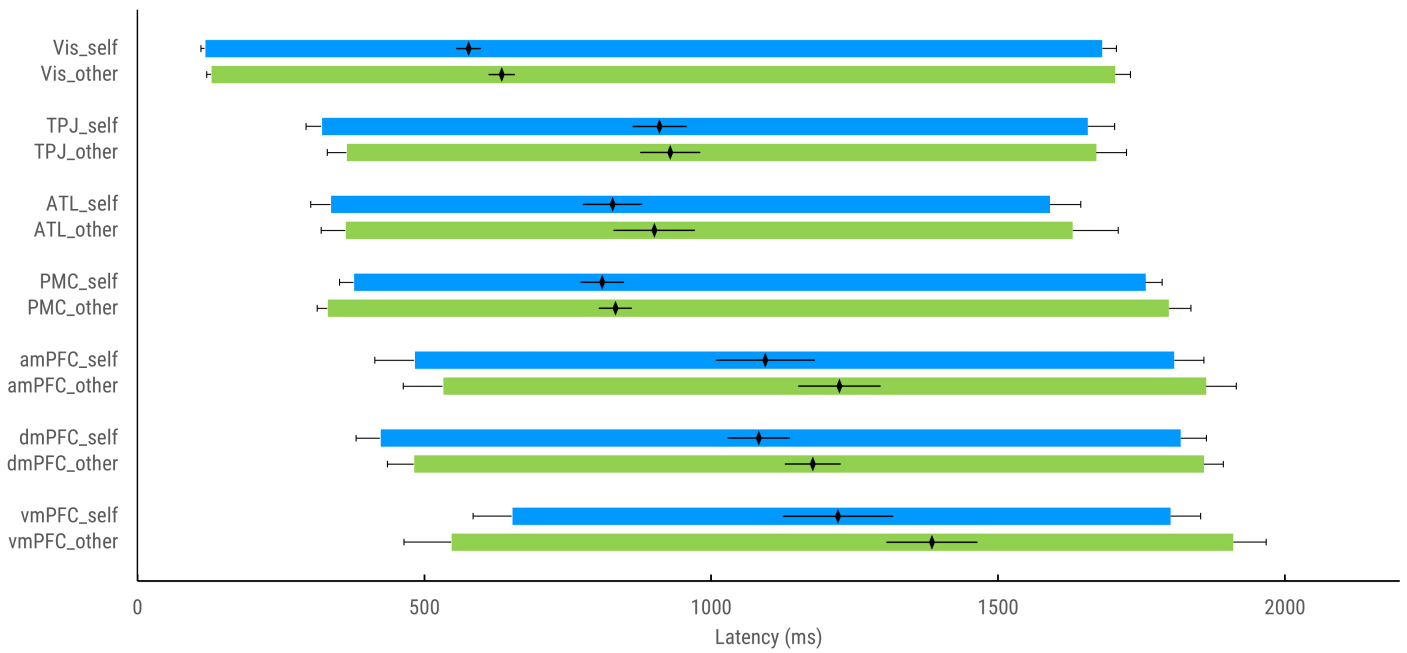



**Supplementary Figure 6:** Expanded lateralized views of Fig. 3a. Sites identified as active, deactive, or nonresponsive for mentalizing versus baseline ( $p_{FDR} < .05$ , corrected across timepoints and sites). Left hemisphere on left column, right hemisphere on right column. *Abbreviations:* Mz = mentalizing (collapsed across self and other).

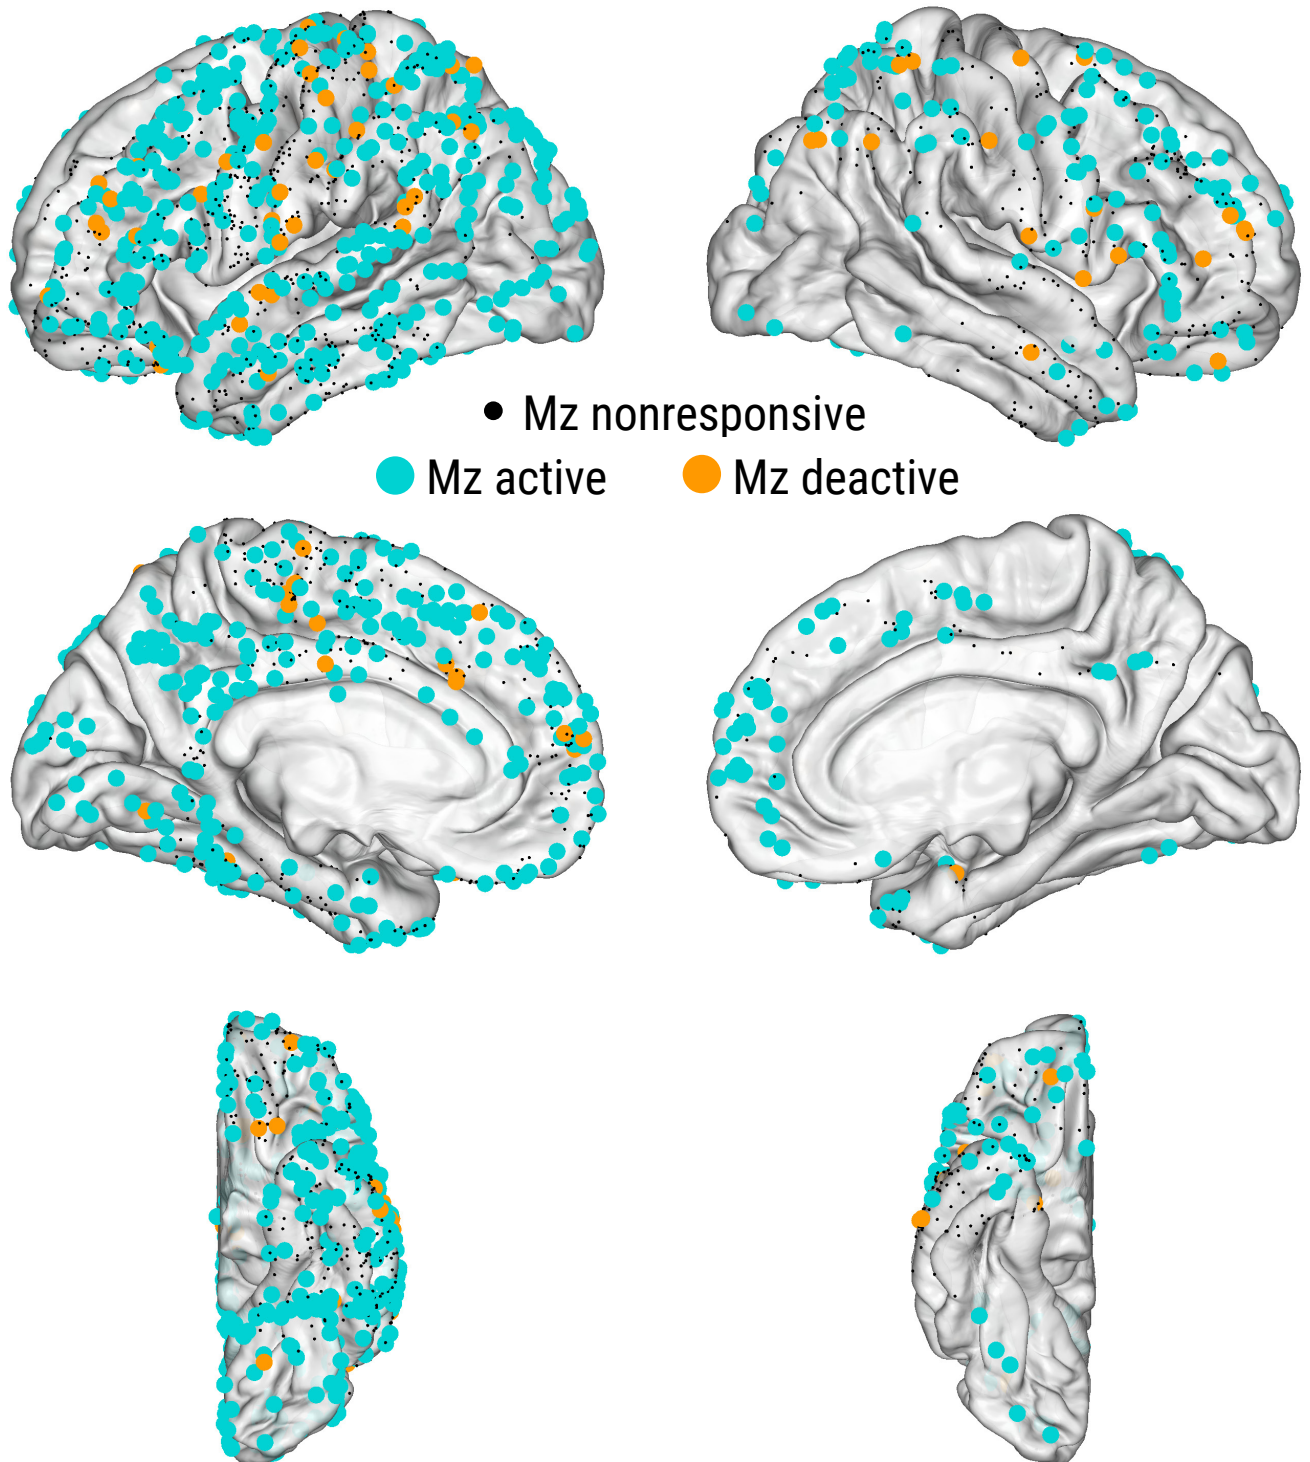

**Supplementary Figure 7:** Expanded lateralized views of Fig. 3c. Functional specificity of mentalizing-active sites. Functional specificity of mentalizing-active sites. <sup>†</sup>Mentalizing-specific sites, defined as mentalizing-active but not cognitive-active ( $p_{FDR} < .05$ , corrected across timepoints and sites) with significantly higher peak power for mentalizing ( $p_{FDR} < .05$ , corrected across sites). <sup>§</sup>Non-specific sites, defined as mentalizing-active and cognitive-active. Left hemisphere on left column, right hemisphere on right column. *Abbreviations:* Mz = mentalizing (collapsed across self and other), Cog = cognitive task (arithmetic).

● Mz active only<sup>†</sup> ● Mz active > Cog deactive<sup>†</sup> ● Mz active > Cog active<sup>§</sup> ● Mz active = Cog active<sup>§</sup> ● Cog active > Mz active<sup>§</sup>

● Mz deactive or nonresponsive

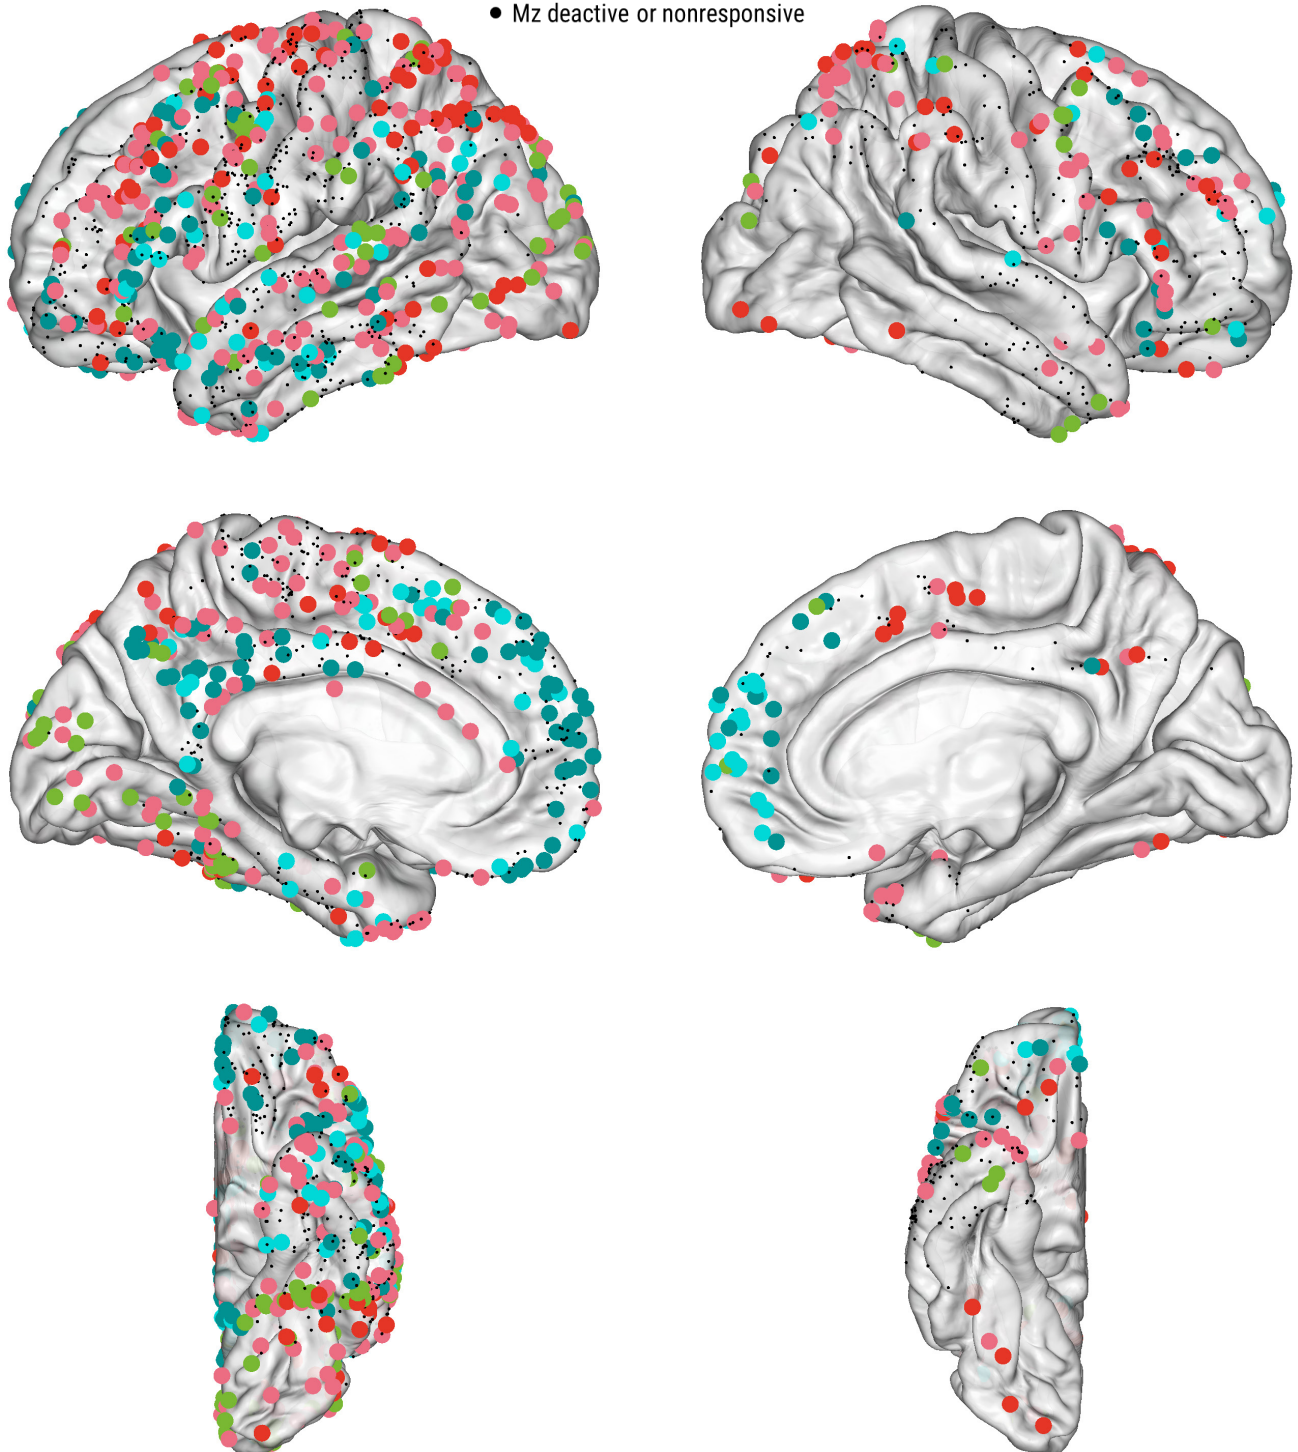

**Supplementary Figure 8:** Expanded lateralized views of Fig. 4a. Mean onset latencies of mentalizing-active sites ( $p_{\text{FDR}} < .05$ , corrected across timepoints and sites). Left hemisphere on left column, right hemisphere on right column.

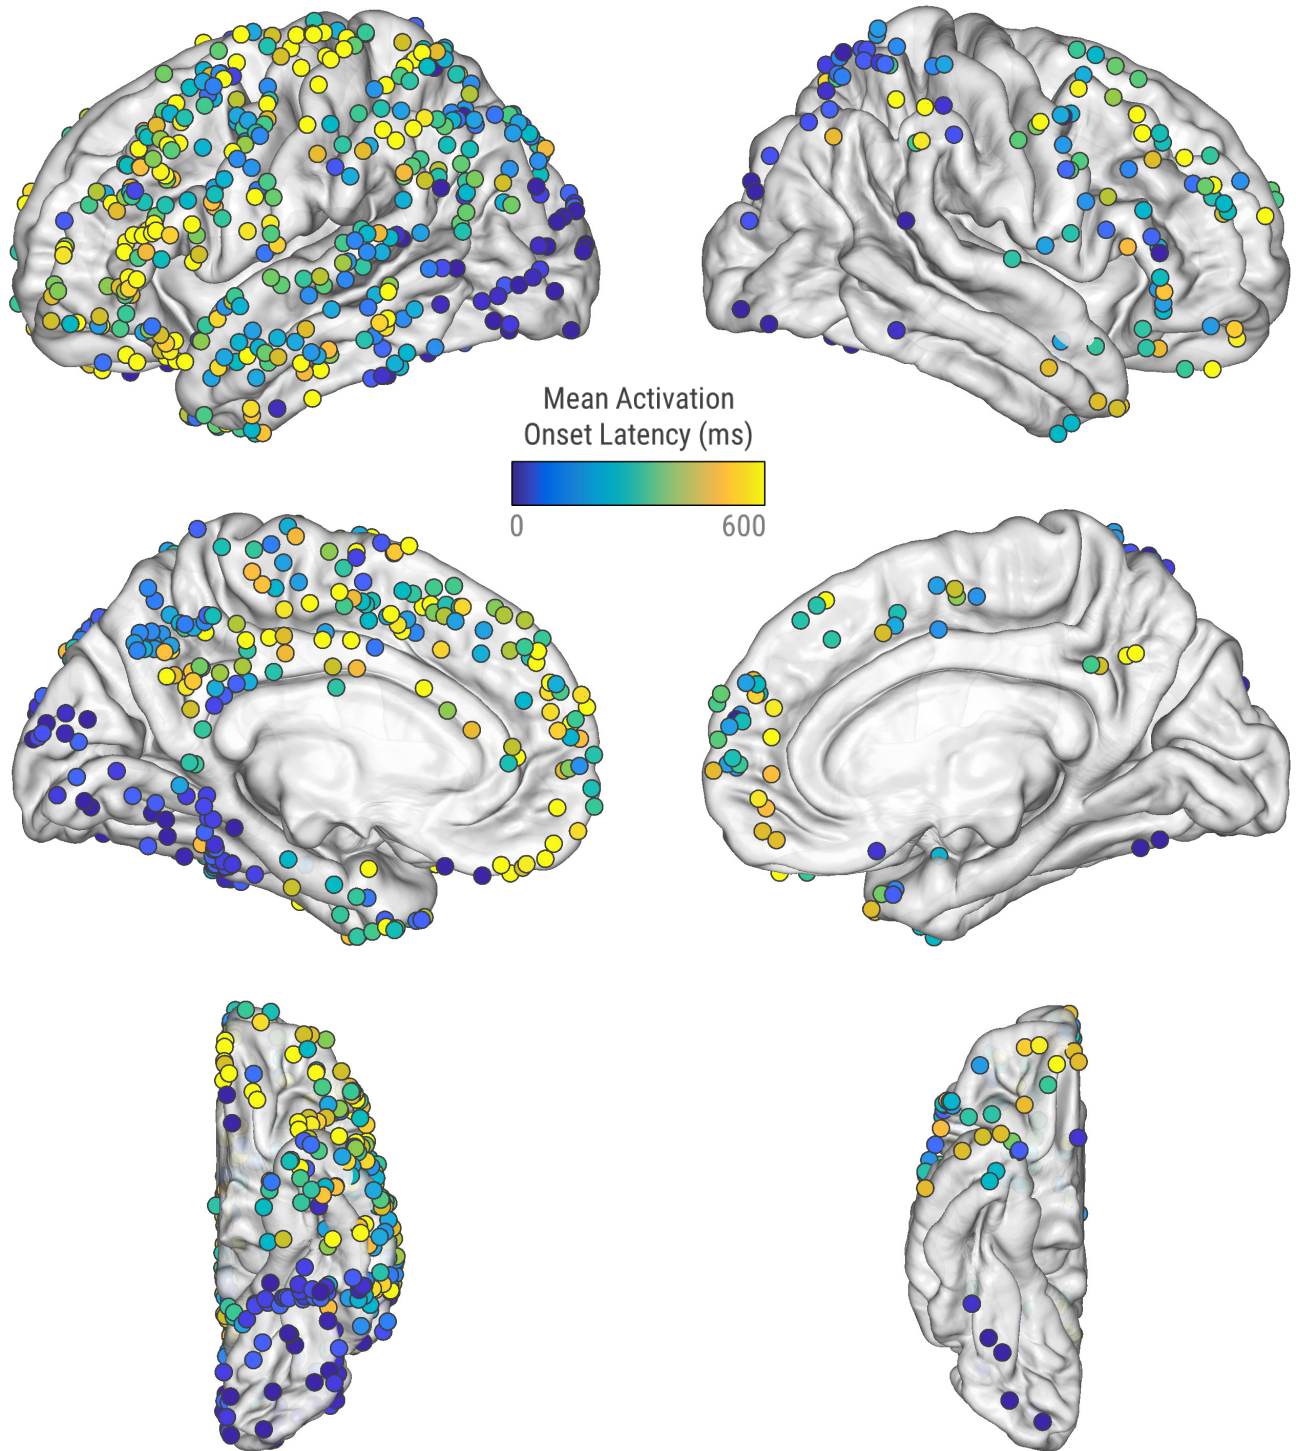

**Supplementary Figure 9:** Expanded lateralized views of Fig. 5a. Functional anatomy of self- and other-mentalizing. Circles represent sites identified as coactive for both mentalizing types versus baseline ( $p_{FDR} < .05$ , corrected across timepoints and sites), colored by self/other differences in peak power ( $p_{FDR} < .05$ , corrected across sites; see Fig. 2). Squares represent sites identified as active for only one mentalizing type with significantly higher peak power for that mentalizing type. Black dots represent sites with nonsignificant mentalizing activations. Left hemisphere on left column, right hemisphere on right column.

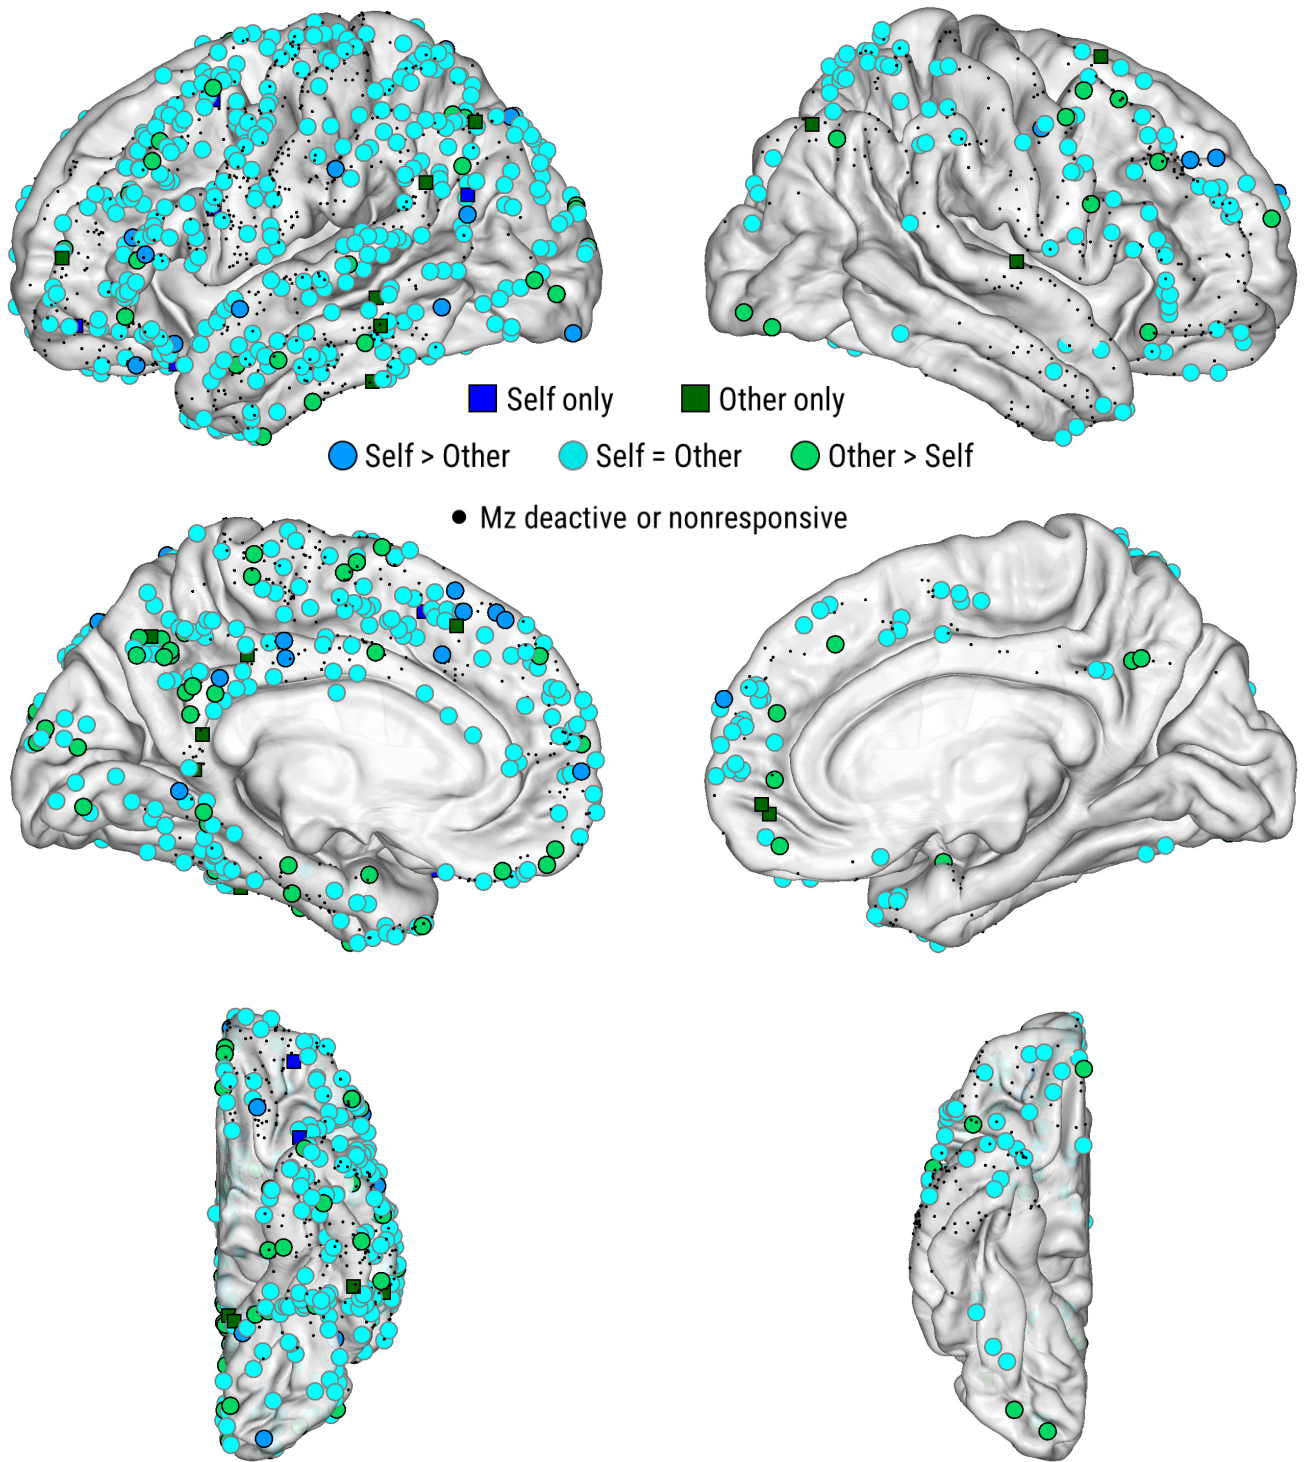

**Supplementary Table 2:** Participant demographics and characteristics.

Participant ECoG implant hemisphere: 12 left, 4 right

Participant handedness: 1 left, 13 right, 2 ambidextrous

Participant IQ: median = 93, range = 71-119

| <b>Participant</b> | <b>Age</b> | <b>Sex</b> |
|--------------------|------------|------------|
| S1                 | 62         | F          |
| S2                 | 40         | M          |
| S3                 | 24         | F          |
| S4                 | 36         | F          |
| S5                 | 22         | F          |
| S6                 | 51         | F          |
| S7                 | 46         | M          |
| S8                 | 31         | F          |
| S9                 | 52         | F          |
| S10                | 28         | M          |
| S11                | 33         | M          |
| S12                | 23         | F          |
| S13                | 38         | F          |
| S14                | 44         | M          |
| S15                | 22         | M          |
| S16                | 48         | F          |

**Supplementary Table 3:** Summary statistics of single-trial HFB metrics from mentalizing-active ROI sites. Source data are provided as a Source Data file. Abbreviations: HFB = high-frequency broadband (70-180 Hz), *N* = number of participants; L = number of sites in left hemisphere; R = number of sites in right hemisphere; *n* = number of sites with significant ( $p_{FDR} < .05$ ) trial-averaged HFB activations; ms = millisecond; *M* = sample mean; *SE* = standard error of the mean

| ROI    | N  | L  | R  | Condition | n  | Latency (ms) |    |      |    |        |    | Duration (ms) |    | Peak Power (z-score) |       |
|--------|----|----|----|-----------|----|--------------|----|------|----|--------|----|---------------|----|----------------------|-------|
|        |    |    |    |           |    | Onset        |    | Peak |    | Offset |    | M             | SE | M                    | SE    |
| Visual | 14 | 95 | 7  | Self      | 71 | 99           | 2  | 514  | 6  | 2254   | 19 | 969           | 12 | 2.067                | 0.013 |
|        |    |    |    | Other     | 71 | 102          | 2  | 594  | 7  | 2273   | 19 | 1002          | 11 | 2.389                | 0.017 |
| TPJ    | 14 | 76 | 19 | Self      | 34 | 304          | 9  | 1044 | 20 | 2156   | 31 | 668           | 15 | 1.629                | 0.018 |
|        |    |    |    | Other     | 36 | 308          | 9  | 1084 | 21 | 2225   | 31 | 713           | 16 | 1.758                | 0.017 |
| ATL    | 12 | 74 | 38 | Self      | 37 | 311          | 9  | 957  | 18 | 2030   | 32 | 545           | 12 | 1.454                | 0.015 |
|        |    |    |    | Other     | 37 | 328          | 11 | 1133 | 22 | 2429   | 31 | 642           | 14 | 1.560                | 0.016 |
| PMC    | 10 | 66 | 9  | Self      | 46 | 335          | 7  | 855  | 12 | 2058   | 26 | 734           | 13 | 1.696                | 0.017 |
|        |    |    |    | Other     | 50 | 328          | 7  | 929  | 13 | 2446   | 25 | 894           | 15 | 1.910                | 0.019 |
| amPFC  | 11 | 36 | 13 | Self      | 22 | 446          | 14 | 1197 | 25 | 2266   | 42 | 703           | 18 | 1.660                | 0.019 |
|        |    |    |    | Other     | 23 | 482          | 15 | 1438 | 30 | 2622   | 40 | 852           | 21 | 1.752                | 0.021 |
| dmPFC  | 10 | 54 | 27 | Self      | 36 | 452          | 10 | 1116 | 19 | 2325   | 32 | 716           | 13 | 1.678                | 0.018 |
|        |    |    |    | Other     | 36 | 483          | 11 | 1419 | 21 | 2623   | 31 | 838           | 16 | 1.691                | 0.017 |
| vmPFC  | 11 | 33 | 8  | Self      | 10 | 537          | 22 | 1382 | 33 | 2444   | 47 | 734           | 24 | 1.816                | 0.028 |
|        |    |    |    | Other     | 11 | 539          | 21 | 1679 | 36 | 3033   | 43 | 1148          | 36 | 2.143                | 0.032 |

**Supplementary Table 4:** Examples of stimulus prompts used in our behavioral task (see Fig. 1a for task).

| <b>Self-mentalizing</b>  | <b>Other-mentalizing</b>           | <b>Cognitive (arithmetic)</b> |
|--------------------------|------------------------------------|-------------------------------|
| I am caring              | My neighbor is caring              | $1 + 18 = 19$                 |
| I am confident           | My neighbor is confident           | $1 + 18 = 25$                 |
| I am curious             | My neighbor is curious             | $1 + 41 = 42$                 |
| I am demanding           | My neighbor is demanding           | $1 + 41 = 50$                 |
| I am focused             | My neighbor is focused             | $10 + 1 = 11$                 |
| I am a good listener     | My neighbor is a good listener     | $10 + 1 = 17$                 |
| I am happy               | My neighbor is happy               | $11 + 2 = 13$                 |
| I am loving              | My neighbor is loving              | $11 + 2 = 16$                 |
| I am moody               | My neighbor is moody               | $16 + 8 = 22$                 |
| I am nurturing           | My neighbor is nurturing           | $16 + 8 = 24$                 |
| I am patient             | My neighbor is patient             | $2 + 52 = 54$                 |
| I am a quick learner     | My neighbor is a quick learner     | $2 + 52 = 56$                 |
| I am quiet               | My neighbor is quiet               | $2 + 60 = 62$                 |
| I am relaxed             | My neighbor is relaxed             | $2 + 60 = 72$                 |
| I am rude                | My neighbor is rude                | $20 + 4 = 17$                 |
| I am selfish             | My neighbor is selfish             | $20 + 4 = 24$                 |
| I am serious             | My neighbor is serious             | $24 + 2 = 19$                 |
| I am silly               | My neighbor is silly               | $24 + 2 = 26$                 |
| I am easily agitated     | My neighbor is easily agitated     | $24 + 5 = 29$                 |
| I am emotional           | My neighbor is emotional           | $24 + 5 = 39$                 |
| I am compassionate       | My neighbor is compassionate       | $24 + 7 = 31$                 |
| I am competitive         | My neighbor is competitive         | $24 + 7 = 35$                 |
| I am controlling         | My neighbor is controlling         | $26 + 7 = 33$                 |
| I am creative            | My neighbor is creative            | $26 + 7 = 34$                 |
| I am dependable          | My neighbor is dependable          | $28 + 6 = 34$                 |
| I am easily bored        | My neighbor is easily bored        | $28 + 6 = 32$                 |
| I am easily disappointed | My neighbor is easily disappointed | $33 + 5 = 32$                 |
| I am easily distracted   | My neighbor is easily distracted   | $33 + 5 = 38$                 |
| I am easily frustrated   | My neighbor is easily frustrated   | $38 + 6 = 42$                 |
| I am easily scared       | My neighbor is easily scared       | $38 + 6 = 44$                 |
| I am easily stressed     | My neighbor is easily stressed     | $4 + 25 = 29$                 |
| I am easily upset        | My neighbor is easily upset        | $4 + 25 = 32$                 |
| I am energetic           | My neighbor is energetic           | $42 + 6 = 48$                 |
| I am friendly            | My neighbor is friendly            | $42 + 6 = 59$                 |
| I am funny               | My neighbor is funny               | $44 + 9 = 51$                 |
| I am generous            | My neighbor is generous            | $44 + 9 = 53$                 |
| I am hard-working        | My neighbor is hard-working        | $45 + 9 = 54$                 |
| I am helpful             | My neighbor is helpful             | $45 + 9 = 50$                 |
| I am honest              | My neighbor is honest              | $47 + 8 = 54$                 |
| I am kind                | My neighbor is kind                | $47 + 8 = 55$                 |
| I am lazy                | My neighbor is lazy                | $47 + 9 = 56$                 |
| I am outgoing            | My neighbor is outgoing            | $47 + 9 = 56$                 |
| I am polite              | My neighbor is polite              | $5 + 63 = 68$                 |
| I am respectful          | My neighbor is respectful          | $5 + 63 = 56$                 |
| I am sensitive           | My neighbor is sensitive           | $5 + 87 = 92$                 |
| I am shy                 | My neighbor is shy                 | $5 + 87 = 90$                 |
| I am smart               | My neighbor is smart               | $9 + 21 = 30$                 |
| I am talkative           | My neighbor is talkative           | $9 + 21 = 33$                 |
| I am observant           | My neighbor is observant           | $49 + 8 = 57$                 |
| I am thoughtful          | My neighbor is thoughtful          | $49 + 8 = 52$                 |

## Supplementary References

1. Jarrett, K., Kavukcuoglu, K., Ranzato, M. & LeCun, Y. What is the best multi-stage architecture for object recognition? in *2009 IEEE 12th International Conference on Computer Vision* 2146–2153 (2009). doi:10.1109/ICCV.2009.5459469.
2. Leeds, D. D., Seibert, D. A., Pyles, J. A. & Tarr, M. J. Comparing visual representations across human fMRI and computational vision. *Journal of vision* **13**, 25–25 (2013).
3. Kruskal, J. B. Multidimensional scaling by optimizing goodness of fit to a nonmetric hypothesis. *Psychometrika* **29**, 1–27 (1964).
4. Victoria, L. W., Pyles, J. A. & Tarr, M. J. The relative contributions of visual and semantic information in the neural representation of object categories. *Brain Behav* **9**, e01373 (2019).
5. Yang, Y., Tarr, M. J., Kass, R. E. & Aminoff, E. M. Exploring spatiotemporal neural dynamics of the human visual cortex. *Human Brain Mapping* **40**, 4213–4238 (2019).
6. Popham, S. F. *et al.* Visual and linguistic semantic representations are aligned at the border of human visual cortex. *Nat Neurosci* **24**, 1628–1636 (2021).
